# Supplementary material for: CASPT2 molecular geometries of Fe( ii ) spin-crossover complexes
Source: Royal Society of Chemistry journal article supplement (doi:10.1039/d1cp04885f), 2021-12-22
Supplement: d1cp04885f2.pdf [file d1cp04885f2.pdf]

## Supporting Information for: CASPT2 molecular geometries of Fe(II) spin-crossover complexes

Brian A. Finney, Sabyasachi Roy Chowdhury, Clara Kirkvold, and Bess Vlasisavljević

Department of Chemistry, University of South Dakota, 414 E Clark St., Vermillion SD, 57069, United States

### Table of Contents.

|                                                                                                                     |   |
|---------------------------------------------------------------------------------------------------------------------|---|
| <b>Table S1.</b> CASPT2 Fe-L bond distances for $[\text{FeL}_6]^{2+}$ .....                                         | 2 |
| <b>Table S2.</b> CASPT2 Fe-L bond distances for $[\text{FeL}_6]^{2+}$ .....                                         | 3 |
| <b>Table S3.</b> $[\text{Fe}(\text{tacn})_2]^{2+}$ bond distances active space and basis set size.....              | 4 |
| <b>Table S4.</b> DFT/def2-TZVP optimized Fe-N bond distances for the $[\text{Fe}(\text{tacn})_2]^{2+}$ complex..... | 4 |
| <b>Table S5.</b> CASPT2 and DFT computed Fe-N bond distances for the $[\text{Fe}(\text{bpy})_3]^{2+}$ complex.....  | 4 |
| <b>Table S6.</b> CASPT2 and DFT computed Fe-N bond distances for the $[\text{Fe}(\text{pic})_3]^{2+}$ complex.....  | 5 |
| <b>Table S7.</b> Percent contributions from the HF determinant to the CASSCF wavefunction.....                      | 5 |
| <b>Table S8.</b> Coupled cluster T1 amplitudes.....                                                                 | 5 |
| <b>Table S9.</b> CASPT2 vibrational frequencies for the HS $[\text{Fe}(\text{tacn})_2]^{2+}$ complex.....           | 6 |
| <b>Table S10.</b> CASPT2 vibrational frequencies for the LS $[\text{Fe}(\text{tacn})_2]^{2+}$ complex.....          | 7 |

**Table S1:** CASPT2/cc-pVTZ computed Fe-L bond distances (in Angstrom) for  $[\text{FeL}_6]^{2+}$  where, L =  $\text{NH}_3$ , NCH,  $\text{PH}_3$ , CO and CNH. DFT/def2-TZVP bond distances are also included for comparison.

| L             | Method | Fe-L Distances      |                     |
|---------------|--------|---------------------|---------------------|
|               |        | HS                  | LS                  |
| $\text{NH}_3$ | CASPT2 | 2.257, 2.258, 2.258 | 1.990, 1.996, 2.091 |
|               |        | 2.258, 2.262, 2.264 | 2.091, 2.091, 2.092 |
|               | TPSSh  | 2.273, 2.275, 2.276 | 2.079, 2.080, 2.080 |
|               |        | 2.280, 2.294, 2.294 | 2.080, 2.080, 2.080 |
|               | PBE    | 2.279, 2.280, 2.283 | 2.073, 2.073, 2.073 |
|               |        | 2.286, 2.300, 2.300 | 2.073, 2.074, 2.074 |
|               | M06    | 2.251, 2.253, 2.270 | 2.086, 2.087, 2.088 |
|               |        | 2.271, 2.283, 2.285 | 2.088, 2.093, 2.094 |
|               | M06-L  | 2.240, 2.241, 2.262 | 2.081, 2.081, 2.081 |
|               |        | 2.262, 2.273, 2.274 | 2.083, 2.086, 2.086 |
| NCH           | CASPT2 | 2.154, 2.154, 2.163 | 1.907, 1.907, 1.907 |
|               |        | 2.164, 2.164, 2.165 | 1.907, 1.907, 1.907 |
|               | TPSSh  | 2.159, 2.159, 2.161 | 1.928, 1.928, 1.928 |
|               |        | 2.161, 2.170, 2.170 | 1.928, 1.928, 1.928 |
|               | PBE    | 2.150, 2.150, 2.150 | 1.908, 1.908, 1.908 |
|               |        | 2.150, 2.176, 2.176 | 1.908, 1.908, 1.908 |
|               | M06    | 2.162, 2.162, 2.166 | 1.943, 1.943, 1.943 |
|               |        | 2.166, 2.167, 2.167 | 1.943, 1.943, 1.943 |
|               | M06-L  | 2.190, 2.190, 2.190 | 1.959, 1.959, 1.960 |
|               |        | 2.190, 2.192, 2.192 | 1.960, 1.960, 1.960 |
| $\text{PH}_3$ | CASPT2 | 2.596, 2.596, 2.617 | 2.207, 2.207, 2.209 |
|               |        | 2.617, 2.618, 2.618 | 2.209, 2.211, 2.211 |
|               | TPSSh  | 2.624, 2.625, 2.632 | 2.262, 2.262, 2.262 |
|               |        | 2.633, 2.662, 2.664 | 2.262, 2.262, 2.263 |
|               | PBE    | 2.571, 2.571, 2.591 | 2.247, 2.247, 2.248 |
|               |        | 2.593, 2.628, 2.630 | 2.248, 2.248, 2.249 |
|               | M06    | 2.609, 2.634, 2.635 | 2.272, 2.273, 2.273 |
|               |        | 2.635, 2.648, 2.657 | 2.274, 2.275, 2.275 |
|               | M06-L  | 2.573, 2.575, 2.597 | 2.249, 2.249, 2.250 |
|               |        | 2.602, 2.604, 2.609 | 2.250, 2.250, 2.253 |
| CO            | CASPT2 | 2.283, 2.284, 2.286 | 1.863, 1.863, 1.864 |
|               |        | 2.286, 2.323, 2.325 | 1.864, 1.864, 1.864 |
|               | TPSSH  | 2.263, 2.263, 2.264 | 1.919, 1.919, 1.919 |
|               |        | 2.264, 2.330, 2.331 | 1.919, 1.919, 1.919 |
|               | PBE    | 2.219, 2.219, 2.221 | 1.894, 1.894, 1.894 |
|               |        | 2.221, 2.319, 2.319 | 1.894, 1.894, 1.894 |
|               | M06    | 2.288, 2.288, 2.288 | 1.933, 1.933, 1.933 |
|               |        | 2.288, 2.344, 2.345 | 1.933, 1.933, 1.933 |
|               | M06-L  | 2.299, 2.300, 2.302 | 1.940, 1.940, 1.940 |
|               |        | 2.302, 2.358, 2.358 | 1.940, 1.940, 1.940 |
| CNH           | CASPT2 | 2.203, 2.203, 2.203 | 1.845, 1.845, 1.846 |
|               |        | 2.203, 2.255, 2.255 | 1.846, 1.864, 1.846 |
|               | TPSSh  | 2.212, 2.213, 2.213 | 1.901, 1.901, 1.901 |
|               |        | 2.213, 2.268, 2.268 | 1.901, 1.901, 1.901 |
|               | PBE    | 2.178, 2.179, 2.179 | 1.882, 1.882, 1.882 |
|               |        | 2.179, 2.259, 2.260 | 1.882, 1.882, 1.882 |
|               | M06    | 2.241, 2.242, 2.247 | 1.917, 1.917, 1.919 |
|               |        | 2.247, 2.301, 2.302 | 1.919, 1.919, 1.919 |
|               | M06-L  | 2.174, 2.175, 2.196 | 1.885, 1.885, 1.887 |
|               |        | 2.198, 2.205, 2.207 | 1.887, 1.887, 1.887 |

**Table S2:** CASPT2 computed Fe-L bond distances (in Angstrom) for  $[\text{FeL}_6]^{2+}$  where, L = NCH and CO as a function of active space and basis set. The atoms with the cc-pVTZ basis set are noted; all remaining atoms are treated with cc-pVDZ basis set.

| L       | Active Space | Basis set           | Fe-L Distances      |                     |                     |
|---------|--------------|---------------------|---------------------|---------------------|---------------------|
|         |              |                     | HS                  | LS                  |                     |
| NCH     | 6e,5o        | all                 | 2.169, 2.169, 2.174 | 1.953, 1.953, 1.953 |                     |
|         |              |                     | 2.174, 2.176, 2.176 | 1.953, 1.953, 1.953 |                     |
|         | 6e,5o        | Fe                  | 2.172, 2.172, 2.174 | 1.955, 1.955, 1.955 |                     |
|         |              |                     | 2.174, 2.177, 2.177 | 1.955, 1.955, 1.955 |                     |
|         | 6e,5o        | Fe, N               | 2.169, 2.169, 2.169 | 1.951, 1.951, 1.951 |                     |
|         |              |                     | 2.169, 2.174, 2.174 | 1.951, 1.951, 1.951 |                     |
|         | 6e,5o        | None                |                     | 2.189, 2.189, 2.190 | 1.977, 1.977, 1.977 |
|         |              |                     |                     | 2.190, 2.192, 2.192 | 1.977, 1.977, 1.977 |
|         | 6e,10o       | Fe                  |                     | 2.177, 2.177, 2.177 | 1.961, 1.961, 1.962 |
|         |              |                     |                     | 2.177, 2.178, 2.178 | 1.962, 1.962, 1.962 |
| 10e,12o | all          | 2.154, 2.154, 2.163 | 1.907, 1.907, 1.907 |                     |                     |
| 10e,12o | Fe           |                     | 2.164, 2.164, 2.165 | 1.907, 1.907, 1.907 |                     |
|         |              |                     | 2.152, 2.142, 2.176 | 1.927, 1.938, 1.952 |                     |
|         |              |                     | 2.185, 2.186, 2.186 | 1.953, 1.969, 1.974 |                     |
| CO      | 6e,5o        | all                 | 2.281, 2.281, 2.290 | 1.798, 1.798, 1.798 |                     |
|         |              |                     | 2.290, 2.319, 2.319 | 1.798, 1.798, 1.798 |                     |
|         | 6e,5o        | Fe                  | 2.281, 2.281, 2.290 | 1.819, 1.819, 1.819 |                     |
|         |              |                     | 2.290, 2.316, 2.316 | 1.819, 1.819, 1.819 |                     |
|         | 6e,5o        | None                |                     | 2.294, 2.294, 2.303 | 1.842, 1.842, 1.842 |
|         |              |                     |                     | 2.303, 2.329, 2.329 | 1.842, 1.842, 1.842 |
|         | 6e,10o       | Fe                  |                     | 2.290, 2.290, 2.298 | 1.871, 1.871, 1.871 |
|         |              |                     |                     | 2.298, 2.324, 2.324 | 1.871, 1.871, 1.871 |
|         | 10e,12o      | all                 |                     | 2.299, 2.300, 2.302 | 1.940, 1.940, 1.940 |
|         |              |                     |                     | 2.302, 2.358, 2.358 | 1.940, 1.940, 1.940 |
| 10e,12o | Fe           |                     | 2.285, 2.285, 2.289 | 1.894, 1.894, 1.894 |                     |
|         |              |                     | 2.289, 2.318, 2.318 | 1.894, 1.894, 1.894 |                     |

**Table S3:** Fe-N bond distances (in Angstrom) of the  $[\text{Fe}(\text{tacn})_2]^{2+}$  complex as a function of basis set and active space. The atoms with the cc-pVTZ basis set are noted; all remaining atoms are treated with cc-pVDZ basis set.

| Active Space | Basis Set           | Fe-N Distances      |                     |
|--------------|---------------------|---------------------|---------------------|
|              |                     | HS                  | LS                  |
| 6e,5o        | all                 | 2.209, 2.209, 2.222 | 2.034, 2.034, 2.034 |
|              |                     | 2.222, 2.224, 2.225 | 2.034, 2.034, 2.034 |
|              | Fe, N               | 2.207, 2.207, 2.221 | 2.034, 2.034, 2.035 |
|              |                     | 2.221, 2.223, 2.223 | 2.035, 2.035, 2.035 |
|              | Fe                  | 2.215, 2.215, 2.223 | 2.035, 2.035, 2.036 |
|              |                     | 2.222, 2.223, 2.224 | 2.036, 2.037, 2.037 |
| none         | 2.215, 2.216, 2.222 | 2.043, 2.043, 2.043 |                     |
|              | 2.223, 2.223, 2.223 | 2.043, 2.044, 2.044 |                     |
| 6e,10o       | Fe                  | 2.212, 2.214, 2.224 | 2.036, 2.036, 2.038 |
|              |                     | 2.225, 2.228, 2.229 | 2.038, 2.038, 2.038 |
| 10e,12o      | Fe                  | 2.212, 2.212, 2.225 | 2.026, 2.029, 2.034 |
|              |                     | 2.226, 2.226, 2.227 | 2.038, 2.042, 2.042 |

**Table S4:** DFT/def2-TZVP optimized Fe-N bond distances (in Angstrom) for the  $[\text{Fe}(\text{tacn})_2]^{2+}$  complex.

| Functional | Fe-N Distance       |                     |
|------------|---------------------|---------------------|
|            | HS                  | LS                  |
| TPSSH      | 2.243, 2.244, 2.251 | 2.048, 2.049, 2.049 |
|            | 2.253, 2.253, 2.253 | 2.049, 2.049, 2.050 |
| PBE        | 2.253, 2.254, 2.259 | 2.044, 2.044, 2.044 |
|            | 2.260, 2.262, 2.262 | 2.045, 2.045, 2.045 |
| M06        | 2.215, 2.219, 2.234 | 2.055, 2.058, 2.060 |
|            | 2.245, 2.249, 2.254 | 2.061, 2.067, 2.067 |
| M06-L      | 2.239, 2.242, 2.258 | 2.060, 2.062, 2.066 |
|            | 2.262, 2.263, 2.264 | 2.067, 2.067, 2.070 |

**Table S5:** CASPT2 and DFT computed Fe-N bond distances (in Angstrom) for the  $[\text{Fe}(\text{bpy})_3]^{2+}$  complex. For the CASPT2 calculations cc-pVTZ basis set is used for the Fe and cc-pVDZ for the rest of the elements. DFT optimizations are performed with def2-TZVP basis set.

| Functional | Fe-N Distance       |                     |
|------------|---------------------|---------------------|
|            | HS                  | LS                  |
| CASPT2     | 2.167, 2.168, 2.168 | 1.938, 1.939, 1.940 |
|            | 2.168, 2.181, 2.182 | 1.940, 1.946, 1.946 |
| TPSSh      | 2.181, 2.183, 2.187 | 1.983, 1.983, 1.984 |
|            | 2.189, 2.204, 2.204 | 1.984, 1.985, 1.986 |
| PBE        | 2.168, 2.174, 2.177 | 1.971, 1.971, 1.971 |
|            | 2.189, 2.191, 2.199 | 1.972, 1.972, 1.973 |
| M06        | 2.188, 2.188, 2.189 | 1.989, 1.991, 2.003 |
|            | 2.195, 2.200, 2.205 | 2.008, 2.009, 2.014 |
| M06-L      | 2.148, 2.159, 2.183 | 1.968, 1.971, 1.983 |
|            | 2.185, 2.186, 2.197 | 1.996, 1.999, 2.001 |

**Table S6:** CASPT2 and DFT computed Fe-N bond distances (in Angstrom) for the  $[\text{Fe}(\text{pic})_3]^{2+}$  complex. For the CASPT2 calculations cc-pVTZ basis set is used for the Fe and cc-pVDZ for the rest of the elements. DFT optimizations are performed with def2-TZVP basis set.

| Functional | Fe-N Distance            |                       |                          |                       |
|------------|--------------------------|-----------------------|--------------------------|-----------------------|
|            | HS                       |                       | LS                       |                       |
|            | Fe-N <sub>pyridine</sub> | Fe-N <sub>amine</sub> | Fe-N <sub>pyridine</sub> | Fe-N <sub>amine</sub> |
| CASPT2     | 2.186, 2.186 2.189       | 2.232, 2.235 2.236    | 1.954, 1.958, 1.980      | 2.021, 2.032 2.035    |
| TPSSh      | 2.192, 2.205 2.210       | 2.267, 2.270<br>2.271 | 1.991, 1.995<br>1.997    | 2.051, 2.051<br>2.053 |
| PBE        | 2.189, 2.195<br>2.205    | 2.276, 2.277<br>2.285 | 1.967, 1.970<br>1.971    | 2.049, 2.053<br>2.054 |
| M06        | 2.159, 2.188<br>2.201    | 2.243, 2.272<br>2.284 | 2.005, 2.009<br>2.024    | 2.065, 2.072<br>2.079 |
| M06-L      | 2.170, 2.177<br>2.196    | 2.243, 2.267<br>2.278 | 1.984, 1.987<br>2.005    | 2.058, 2.073<br>2.077 |

**Table S7.** Percent contributions from the HF determinant to the CASSCF wavefunction. Results are reported on the CASPT2 minimum geometry and the cc-pVTZ basis set was used on all atoms.

| Complex                           | HS contribution | LS contribution |
|-----------------------------------|-----------------|-----------------|
| $[\text{Fe}(\text{NH}_3)_6]^{2+}$ | 0.974           | 0.964           |
| $[\text{Fe}(\text{NCH})_6]^{2+}$  | 0.934           | 0.934           |
| $[\text{Fe}(\text{PH}_3)_6]^{2+}$ | 0.832           | 0.878           |
| $[\text{Fe}(\text{CO})_6]^{2+}$   | 0.975           | 0.896           |
| $[\text{Fe}(\text{CNH})_6]^{2+}$  | 0.978           | 0.946           |

**Table S8.** Coupled cluster T1 amplitudes from the calculation with frozen 3s3p orbitals. Values greater than 0.02 are indicative of multireference character.

| Complex                           | HS contribution | LS contribution |
|-----------------------------------|-----------------|-----------------|
| $[\text{Fe}(\text{NH}_3)_6]^{2+}$ | 0.01414         | 0.02187         |
| $[\text{Fe}(\text{NCH})_6]^{2+}$  | 0.01656         | 0.02670         |
| $[\text{Fe}(\text{PH}_3)_6]^{2+}$ | 0.02148         | 0.05037         |
| $[\text{Fe}(\text{CO})_6]^{2+}$   | 0.02106         | 0.03841         |
| $[\text{Fe}(\text{CNH})_6]^{2+}$  | 0.01941         | 0.03853         |

**Table S9.** CASPT2 vibrational frequencies in  $\text{cm}^{-1}$  for HS state of the  $[\text{Fe}(\text{tacn})_2]^{2+}$  complex computed with the minimal  $(6e,5o)$  active space and the cc-pVDZ basis set on all atoms.

| Frequencies |         |         |         |         |         |
|-------------|---------|---------|---------|---------|---------|
| 0.00        | 0.00    | 0.00    | 0.00    | 0.00    | 0.00    |
| 39.24       | 41.63   | 70.06   | 117.92  | 136.44  | 151.48  |
| 168.11      | 186.63  | 189.27  | 192.24  | 197.22  | 234.53  |
| 263.07      | 278.06  | 301.37  | 310.18  | 313.64  | 315.30  |
| 317.46      | 393.32  | 394.31  | 397.69  | 401.14  | 405.93  |
| 408.76      | 461.19  | 473.83  | 553.15  | 553.52  | 565.95  |
| 566.37      | 592.24  | 595.74  | 782.03  | 785.01  | 793.20  |
| 796.39      | 833.43  | 835.80  | 870.40  | 879.02  | 879.17  |
| 880.47      | 881.39  | 883.80  | 941.05  | 956.83  | 990.50  |
| 996.18      | 998.61  | 999.05  | 1039.32 | 1045.55 | 1047.71 |
| 1053.19     | 1059.71 | 1060.22 | 1099.35 | 1100.65 | 1116.96 |
| 1119.01     | 1135.37 | 1135.68 | 1137.85 | 1138.98 | 1175.74 |
| 1177.05     | 1177.74 | 1179.08 | 1259.59 | 1260.84 | 1264.14 |
| 1264.44     | 1291.35 | 1292.86 | 1293.41 | 1295.25 | 1311.13 |
| 1311.20     | 1320.33 | 1323.62 | 1369.15 | 1369.98 | 1371.92 |
| 1394.24     | 1395.55 | 1396.13 | 1396.70 | 1399.87 | 1406.07 |
| 1406.20     | 1406.82 | 1409.48 | 1453.87 | 1457.57 | 1462.65 |
| 1463.51     | 1464.80 | 1466.36 | 1482.04 | 1484.67 | 1487.40 |
| 1487.72     | 1494.95 | 1496.91 | 1497.03 | 1497.19 | 1498.21 |
| 1499.52     | 1515.13 | 1515.59 | 3087.99 | 3088.13 | 3088.92 |
| 3089.33     | 3090.48 | 3090.98 | 3119.13 | 3120.27 | 3121.60 |
| 3122.16     | 3126.83 | 3127.30 | 3148.90 | 3149.77 | 3150.14 |
| 3150.71     | 3151.42 | 3152.04 | 3180.28 | 3181.15 | 3183.26 |
| 3183.70     | 3192.79 | 3193.05 | 3523.29 | 3524.39 | 3524.72 |
| 3524.81     | 3525.45 | 3525.86 |         |         |         |

**Table S10.** CASPT2 vibrational frequencies in  $\text{cm}^{-1}$  for LS state of the  $[\text{Fe}(\text{tacn})_2]^{2+}$  complex computed with the minimal  $(6e,5o)$  active space and the cc-pVDZ basis set on all atoms.

| Frequencies LS |         |         |         |         |         |
|----------------|---------|---------|---------|---------|---------|
| 0.00           | 0.00    | 0.00    | 0.00    | 0.00    | 0.00    |
| 94.37          | 123.40  | 123.41  | 184.59  | 184.75  | 191.12  |
| 209.15         | 209.34  | 223.19  | 223.21  | 318.05  | 322.16  |
| 330.89         | 330.95  | 346.13  | 366.19  | 366.31  | 387.56  |
| 387.76         | 410.50  | 428.68  | 428.71  | 449.97  | 455.80  |
| 455.91         | 505.56  | 508.25  | 573.94  | 574.11  | 609.71  |
| 609.82         | 615.29  | 623.69  | 802.59  | 802.74  | 823.50  |
| 823.68         | 850.36  | 855.21  | 883.20  | 887.81  | 900.21  |
| 900.30         | 902.63  | 902.69  | 982.29  | 993.84  | 1001.13 |
| 1001.22        | 1003.90 | 1004.00 | 1064.41 | 1065.15 | 1065.16 |
| 1066.07        | 1075.67 | 1075.75 | 1099.16 | 1104.79 | 1110.00 |
| 1116.63        | 1140.11 | 1140.30 | 1147.27 | 1147.39 | 1170.03 |
| 1170.14        | 1173.06 | 1173.18 | 1255.38 | 1255.43 | 1259.43 |
| 1259.47        | 1291.52 | 1291.56 | 1296.98 | 1297.03 | 1304.09 |
| 1304.78        | 1317.10 | 1324.29 | 1368.61 | 1369.28 | 1393.05 |
| 1393.16        | 1393.68 | 1396.09 | 1396.21 | 1401.85 | 1404.13 |
| 1404.22        | 1412.23 | 1412.33 | 1454.83 | 1461.52 | 1461.58 |
| 1461.72        | 1466.84 | 1466.98 | 1486.09 | 1486.19 | 1490.50 |
| 1490.63        | 1501.86 | 1501.88 | 1502.38 | 1503.47 | 1508.57 |
| 1508.63        | 1516.63 | 1517.04 | 3098.63 | 3099.12 | 3099.31 |
| 3099.89        | 3099.91 | 3100.55 | 3123.99 | 3124.55 | 3124.79 |
| 3124.90        | 3129.46 | 3129.74 | 3159.86 | 3160.50 | 3160.82 |
| 3161.31        | 3161.38 | 3161.93 | 3185.82 | 3186.24 | 3186.49 |
| 3186.63        | 3196.01 | 3196.22 | 3517.22 | 3517.50 | 3517.61 |
| 3517.97        | 3518.13 | 3518.34 |         |         |         |
